# Supplementary material for: Sodium‐glucose cotransporter‐2 inhibitors and the risk of gout in patients with type 2 diabetes mellitus: A propensity‐score‐matched, new‐user design study with an active comparator using the IQVIA Medical Research Data UK database
Source: PubMed Central journal article supplement — Diabetes Obes Metab. 2022 Sep 20;25(1):156–65. doi: 10.1111/dom.14858 (PMC10087572; doi:10.1111/dom.14858), 2022-09-20
Supplement: DOM-25-156-s001.pdf [file DOM-25-156-s001.pdf]

Eligible patients aged 18 or above with type 2 diabetes between Nov 2012 and Dec 2018  
(n=362,937)

New prescription of SGLT2i  
(n=25,507)

New prescription of DPP4i  
(n=33,553)

Exclusion of patients:

- With a prescription of SGLT2i or DPP4i in the 12 months period prior to the index (n=10,507)
- With a diagnosis of type 1 diabetes, secondary diabetes before index (n=385)
- With a diagnosis of gestational diabetes in the 12 months period prior to index date (n=4)
- With a diagnosis of end stage renal disease before index (n=8)
- With a diagnosis of gout before index (n=986)

Exclusion of patients:

- With a prescription of SGLT2i or DPP4i in the 12 months period prior to the index (n=96)
- With a diagnosis of type 1 diabetes, secondary diabetes before index (n=470)
- With a diagnosis of gestational diabetes in the 12 months period prior to index date (n=0)
- With a diagnosis of end stage renal disease before index (n=196)
- With a diagnosis of gout before index (n=3,365)

SGLT2i cohort  
(n=13,617)

DPP4i Cohort  
(n=29,426)

For the intention to treat analysis, follow-up ends at the earliest of:

1. Patient death
2. Patient transfer out of practice
3. End of practice data collection
4. Study end date
5. Development of AMD

Median Follow-Up (IQR) – 1.74 (0.78-3.07)

For the on treatment analysis, follow-up ends at the earliest of

1. Above scenarios
2. Discontinuation of exposure drug of interest
3. Switch to comparator drug

Median Follow-Up (IQR) – 1.12 (0.50-2.22)
